# Supplementary material for: Quantitative glycoproteomics analysis identifies novel FUT8 targets and signaling networks critical for breast cancer cell invasiveness
Source: Breast Cancer Res. 2022 Mar 18;24:21. doi: 10.1186/s13058-022-01513-3 (PMC8932202; doi:10.1186/s13058-022-01513-3)
Supplement: Supplementary file 4 — Additional file 4: Table S2. Prognostic value of FUT8 target proteins. [file 13058_2022_1513_MOESM4_ESM.xlsx]

## Sheet: 工作表1
Accession	Gene Name	Description	HTTP	Prognostic	F / UF	Cancer types
P11117	ACP2	Lysosomal acid phosphatase OS=Homo sapiens GN=ACP2 PE=1 SV=3 - [PPAL_HUMAN]	https://www.proteinatlas.org/ENSG00000134575-ACP2/pathology	Prognostic marker in endometrial cancer (favourable).	F	endometrial cancer
Q13443	ADAM9	Disintegrin and metalloproteinase domain-containing protein 9 OS=Homo sapiens GN=ADAM9 PE=1 SV=1 - [ADAM9_HUMAN]	https://www.proteinatlas.org/ENSG00000168615-ADAM9/pathology	Prognostic marker in liver cancer (unfavourable), pancreatic cancer (unfavourable), breast cancer (unfavourable), cervical cancer (unfavourable) and renal cancer(unfavourable).	UF	liver cancer (unfavourable), pancreatic cancer (unfavourable), breast cancer (unfavourable), cervical cancer (unfavourable) and renal cancer(unfavourable)
O95490	ADGRL2	Latrophilin-2 OS=Homo sapiens GN=LPHN2 PE=1 SV=2 - [LPHN2_HUMAN]	https://www.proteinatlas.org/ENSG00000117114-ADGRL2/pathology	Prognostic marker in endometrial cancer (unfavourable), stomach cancer (unfavourable) and liver cancer (unfavourable).	UF	endometrial cancer (unfavourable), stomach cancer (unfavourable) and liver cancer (unfavourable).
Q13740	ALCAM	CD166 antigen OS=Homo sapiens GN=ALCAM PE=1 SV=2 - [CD166_HUMAN]	https://www.proteinatlas.org/ENSG00000170017-ALCAM/pathology	Prognostic marker in renal cancer (favourable).	F	renal cancer
Q4KMQ2	ANO6	Anoctamin-6 OS=Homo sapiens GN=ANO6 PE=1 SV=2 - [ANO6_HUMAN]	https://www.proteinatlas.org/ENSG00000177119-ANO6/pathology	Prognostic marker in breast cancer (unfavourable) and cervical cancer (unfavourable).	UF	breast cancer (unfavourable) and cervical cancer (unfavourable)
P58335	ANTXR2	Anthrax toxin receptor 2 OS=Homo sapiens GN=ANTXR2 PE=1 SV=5 - [ANTR2_HUMAN]	https://www.proteinatlas.org/ENSG00000163297-ANTXR2/pathology	Prognostic marker in renal cancer (unfavourable) and pancreatic cancer (unfavourable).	UF	renal cancer (unfavourable) and pancreatic cancer (unfavourable)
Q9HDC9	APMAP	Adipocyte plasma membrane-associated protein OS=Homo sapiens GN=APMAP PE=1 SV=2 - [APMAP_HUMAN]	https://www.proteinatlas.org/ENSG00000101474-APMAP/pathology
Q12797	ASPH	Aspartyl/asparaginyl beta-hydroxylase OS=Homo sapiens GN=ASPH PE=1 SV=3 - [ASPH_HUMAN]	https://www.proteinatlas.org/ENSG00000198363-ASPH/pathology	Prognostic marker in renal cancer (unfavourable), cervical cancer (unfavourable), pancreatic cancer (unfavourable), lung cancer (unfavourable) and thyroid cancer(unfavourable).	UF	renal cancer (unfavourable), cervical cancer (unfavourable), pancreatic cancer (unfavourable), lung cancer (unfavourable) and thyroid cancer(unfavourable).
P54709	ATP1B3	Sodium/potassium-transporting ATPase subunit beta-3 OS=Homo sapiens GN=ATP1B3 PE=1 SV=1 - [AT1B3_HUMAN]	https://www.proteinatlas.org/ENSG00000069849-ATP1B3/pathology	Prognostic marker in liver cancer (unfavourable), renal cancer (unfavourable) and endometrial cancer (favourable).	UF/F	liver cancer (unfavourable), renal cancer (unfavourable) and endometrial cancer (favourable)
Q9Y487	ATP6V0A2	V-type proton ATPase 116 kDa subunit a isoform 2 OS=Homo sapiens GN=ATP6V0A2 PE=1 SV=2 - [VPP2_HUMAN]	https://www.proteinatlas.org/ENSG00000185344-ATP6V0A2/pathology
O75882	ATRN	Attractin OS=Homo sapiens GN=ATRN PE=1 SV=2 - [ATRN_HUMAN]	https://www.proteinatlas.org/ENSG00000088812-ATRN/pathology	Prognostic marker in renal cancer (favourable).	F	renal cancer (favourable)
P30530	AXL	Tyrosine-protein kinase receptor UFO OS=Homo sapiens GN=AXL PE=1 SV=3 - [UFO_HUMAN]	https://www.proteinatlas.org/ENSG00000167601-AXL/pathology	Prognostic marker in renal cancer (unfavourable).	UF	renal cancer (unfavourable).
P50895	BCAM	Basal cell adhesion molecule OS=Homo sapiens GN=BCAM PE=1 SV=2 - [BCAM_HUMAN]	https://www.proteinatlas.org/ENSG00000187244-BCAM/pathology	Prognostic marker in renal cancer (favourable), endometrial cancer (unfavourable) and colorectal cancer (unfavourable).	UF/F	renal cancer (favourable), endometrial cancer (unfavourable) and colorectal cancer (unfavourable)
P35613	BSG	Basigin OS=Homo sapiens GN=BSG PE=1 SV=2 - [BASI_HUMAN]	https://www.proteinatlas.org/ENSG00000172270-BSG/pathology	Prognostic marker in renal cancer (favourable), liver cancer (unfavourable) and endometrial cancer (favourable).	UF/F	renal cancer (favourable), liver cancer (unfavourable) and endometrial cancer (favourable)
P54289	CACNA2D1	Voltage-dependent calcium channel subunit alpha-2/delta-1 OS=Homo sapiens GN=CACNA2D1 PE=1 SV=3 - [CA2D1_HUMAN]	https://www.proteinatlas.org/ENSG00000153956-CACNA2D1/pathology	Prognostic marker in renal cancer (unfavourable).	UF	renal cancer (unfavourable)
Q5ZPR3	CD276	CD276 antigen OS=Homo sapiens GN=CD276 PE=1 SV=1 - [CD276_HUMAN]	https://www.proteinatlas.org/ENSG00000103855-CD276/pathology	Prognostic marker in renal cancer (unfavourable) and liver cancer (unfavourable).	UF	renal cancer (unfavourable) and liver cancer (unfavourable)
P16070	CD44	CD44 antigen OS=Homo sapiens GN=CD44 PE=1 SV=3 - [CD44_HUMAN]	https://www.proteinatlas.org/ENSG00000026508-CD44/pathology	Prognostic marker in renal cancer (unfavourable).	UF	renal cancer (unfavourable)
Q08722	CD47	Leukocyte surface antigen CD47 OS=Homo sapiens GN=CD47 PE=1 SV=1 - [CD47_HUMAN]	https://www.proteinatlas.org/ENSG00000196776-CD47/pathology	Prognostic marker in thyroid cancer (favourable), renal cancer (unfavourable) and endometrial cancer (unfavourable).	UF/F	thyroid cancer (favourable), renal cancer (unfavourable) and endometrial cancer (unfavourable)
P13987	CD59	CD59 glycoprotein OS=Homo sapiens GN=CD59 PE=1 SV=1 - [CD59_HUMAN]	https://www.proteinatlas.org/ENSG00000085063-CD59/pathology	Prognostic marker in renal cancer (favourable), pancreatic cancer (unfavourable), head and neck cancer (unfavourable), cervical cancer (unfavourable) and stomach cancer(unfavourable).	UF/F	renal cancer (favourable), pancreatic cancer (unfavourable), head and neck cancer (unfavourable), cervical cancer (unfavourable) and stomach cancer(unfavourable)
P08962	CD63	CD63 antigen OS=Homo sapiens GN=CD63 PE=1 SV=2 - [CD63_HUMAN]	https://www.proteinatlas.org/ENSG00000135404-CD63/pathology	Prognostic marker in liver cancer (unfavourable).	UF	liver cancer (unfavourable)
P48960	CD97	CD97 antigen OS=Homo sapiens GN=CD97 PE=1 SV=4 - [CD97_HUMAN]	https://www.proteinatlas.org/ENSG00000123146-ADGRE5/pathology	Prognostic marker in renal cancer (unfavourable) and liver cancer (unfavourable).	UF	renal cancer (unfavourable) and liver cancer (unfavourable)
P55285	CDH6	Cadherin-6 OS=Homo sapiens GN=CDH6 PE=1 SV=1 - [CADH6_HUMAN]	https://www.proteinatlas.org/ENSG00000113361-CDH6/pathology
Q9H6B4	CLMP	CXADR-like membrane protein OS=Homo sapiens GN=CLMP PE=1 SV=1 - [CLMP_HUMAN]	https://www.proteinatlas.org/ENSG00000166250-CLMP/pathology
O96005	CLPTM1	Cleft lip and palate transmembrane protein 1 OS=Homo sapiens GN=CLPTM1 PE=1 SV=1 - [CLPT1_HUMAN]	https://www.proteinatlas.org/ENSG00000104853-CLPTM1/pathology
Q96KA5	CLPTM1L	Cleft lip and palate transmembrane protein 1-like protein OS=Homo sapiens GN=CLPTM1L PE=1 SV=1 - [CLP1L_HUMAN]	https://www.proteinatlas.org/ENSG00000049656-CLPTM1L/pathology	Prognostic marker in liver cancer (unfavourable).	UF	liver cancer (unfavourable)
O75976	CPD	Carboxypeptidase D OS=Homo sapiens GN=CPD PE=1 SV=2 - [CBPD_HUMAN]	https://www.proteinatlas.org/ENSG00000108582-CPD/pathology
P53634	CTSC	Dipeptidyl peptidase 1 OS=Homo sapiens GN=CTSC PE=1 SV=2 - [CATC_HUMAN]	https://www.proteinatlas.org/ENSG00000109861-CTSC/pathology	Prognostic marker in liver cancer (unfavourable) and renal cancer (favourable).	UF/F	liver cancer (unfavourable) and renal cancer (favourable)
Q14126	DSG2	Desmoglein-2 OS=Homo sapiens GN=DSG2 PE=1 SV=2 - [DSG2_HUMAN]	https://www.proteinatlas.org/ENSG00000046604-DSG2/pathology	Prognostic marker in renal cancer (favourable), pancreatic cancer (unfavourable), lung cancer (unfavourable), head and neck cancer (unfavourable), colorectal cancer(favourable) and cervical cancer (unfavourable).	UF/F	renal cancer (favourable), pancreatic cancer (unfavourable), lung cancer (unfavourable), head and neck cancer (unfavourable), colorectal cancer(favourable) and cervical cancer (unfavourable).
P42892	ECE1	Endothelin-converting enzyme 1 OS=Homo sapiens GN=ECE1 PE=1 SV=2 - [ECE1_HUMAN]	https://www.proteinatlas.org/ENSG00000117298-ECE1/pathology
O43854	EDIL3	EGF-like repeat and discoidin I-like domain-containing protein 3 OS=Homo sapiens GN=EDIL3 PE=1 SV=1 - [EDIL3_HUMAN]	https://www.proteinatlas.org/ENSG00000164176-EDIL3/pathology
P00533	EGFR	Epidermal growth factor receptor OS=Homo sapiens GN=EGFR PE=1 SV=2 - [EGFR_HUMAN]	https://www.proteinatlas.org/ENSG00000146648-EGFR/pathology	Prognostic marker in urothelial cancer (unfavourable).	UF	urothelial cancer (unfavourable)
Q6PCB8	EMB	Embigin OS=Homo sapiens GN=EMB PE=1 SV=1 - [EMB_HUMAN]	https://www.proteinatlas.org/ENSG00000170571-EMB/pathology	Prognostic marker in renal cancer (unfavourable).	UF	renal cancer (unfavourable)
P29317	EPHA2	Ephrin type-A receptor 2 OS=Homo sapiens GN=EPHA2 PE=1 SV=2 - [EPHA2_HUMAN]	https://www.proteinatlas.org/ENSG00000142627-EPHA2/pathology
P13726	F3	Tissue factor OS=Homo sapiens GN=F3 PE=1 SV=1 - [TF_HUMAN]	https://www.proteinatlas.org/ENSG00000117525-F3/pathology	Prognostic marker in renal cancer (unfavourable) and pancreatic cancer (unfavourable).	UF	renal cancer (unfavourable) and pancreatic cancer (unfavourable)
Q8TBP5	FAM174A	Membrane protein FAM174A OS=Homo sapiens GN=FAM174A PE=2 SV=1 - [F174A_HUMAN]	https://www.proteinatlas.org/ENSG00000174132-FAM174A/pathology	Prognostic marker in glioma (unfavourable) and renal cancer (favourable).	UF/F	glioma (unfavourable) and renal cancer (favourable)
Q9H0X4	FAM234A	Protein ITFG3 OS=Homo sapiens GN=ITFG3 PE=1 SV=1 - [ITFG3_HUMAN]	https://www.proteinatlas.org/ENSG00000167930-FAM234A/pathology
Q14517	FAT1	Protocadherin Fat 1 OS=Homo sapiens GN=FAT1 PE=1 SV=2 - [FAT1_HUMAN]	https://www.proteinatlas.org/ENSG00000083857-FAT1/pathology	Prognostic marker in lung cancer (unfavourable).	UF	lung cancer (unfavourable)
P02751	FN1	Fibronectin OS=Homo sapiens GN=FN1 PE=1 SV=4 - [FINC_HUMAN]	https://www.proteinatlas.org/ENSG00000115414-FN1/pathology	Prognostic marker in renal cancer (unfavourable), stomach cancer (unfavourable) and urothelial cancer (unfavourable).	UF	renal cancer (unfavourable), stomach cancer (unfavourable) and urothelial cancer (unfavourable)
Q12841	FSTL1	Follistatin-related protein 1 OS=Homo sapiens GN=FSTL1 PE=1 SV=1 - [FSTL1_HUMAN]	https://www.proteinatlas.org/ENSG00000163430-FSTL1/pathology	Prognostic marker in renal cancer (unfavourable).	UF	renal cancer (unfavourable)
Q7Z7M9	GALNT5	Polypeptide N-acetylgalactosaminyltransferase 5 OS=Homo sapiens GN=GALNT5 PE=1 SV=1 - [GALT5_HUMAN]	https://www.proteinatlas.org/ENSG00000136542-GALNT5/pathology
P04062	GBA	Glucosylceramidase OS=Homo sapiens GN=GBA PE=1 SV=3 - [GLCM_HUMAN]	https://www.proteinatlas.org/ENSG00000177628-GBA/pathology
P16278	GLB1	Beta-galactosidase OS=Homo sapiens GN=GLB1 PE=1 SV=2 - [BGAL_HUMAN]	https://www.proteinatlas.org/ENSG00000170266-GLB1/pathology	Prognostic marker in renal cancer (favourable).	F	renal cancer (favourable)
Q92896	GLG1	Golgi apparatus protein 1 OS=Homo sapiens GN=GLG1 PE=1 SV=2 - [GSLG1_HUMAN]	https://www.proteinatlas.org/ENSG00000090863-GLG1/pathology	Prognostic marker in renal cancer (favourable), cervical cancer (unfavourable) and urothelial cancer (unfavourable).	UF/F	renal cancer (favourable), cervical cancer (unfavourable) and urothelial cancer (unfavourable)
Q8WWB7	GLMP	Glycosylated lysosomal membrane protein OS=Homo sapiens GN=GLMP PE=2 SV=1 - [GLMP_HUMAN]	https://www.proteinatlas.org/ENSG00000198715-GLMP/pathology	Prognostic marker in liver cancer (unfavourable).	UF	liver cancer (unfavourable)
P15586	GNS	N-acetylglucosamine-6-sulfatase OS=Homo sapiens GN=GNS PE=1 SV=3 - [GNS_HUMAN]	https://www.proteinatlas.org/ENSG00000135677-GNS/pathology	Prognostic marker in liver cancer (unfavourable) and glioma (unfavourable).	UF	liver cancer (unfavourable) and glioma (unfavourable)
O00461	GOLIM4	Golgi integral membrane protein 4 OS=Homo sapiens GN=GOLIM4 PE=1 SV=1 - [GOLI4_HUMAN]	https://www.proteinatlas.org/ENSG00000173905-GOLIM4/pathology
Q8NBJ4	GOLM1	Golgi membrane protein 1 OS=Homo sapiens GN=GOLM1 PE=1 SV=1 - [GOLM1_HUMAN]	https://www.proteinatlas.org/ENSG00000135052-GOLM1/pathology	Prognostic marker in endometrial cancer (favourable) and liver cancer (unfavourable).	UF/F	endometrial cancer (favourable) and liver cancer (unfavourable)
P28799	GRN	Granulins OS=Homo sapiens GN=GRN PE=1 SV=2 - [GRN_HUMAN]	https://www.proteinatlas.org/ENSG00000030582-GRN/pathology	Prognostic marker in glioma (unfavourable)	UF	glioma (unfavourable)
Q9ULI3	HEG1	Protein HEG homolog 1 OS=Homo sapiens GN=HEG1 PE=1 SV=3 - [HEG1_HUMAN]	https://www.proteinatlas.org/ENSG00000173706-HEG1/pathology	Prognostic marker in renal cancer (unfavourable) and urothelial cancer (unfavourable).	UF	renal cancer (unfavourable) and urothelial cancer (unfavourable)
P07686	HEXB	Beta-hexosaminidase subunit beta OS=Homo sapiens GN=HEXB PE=1 SV=3 - [HEXB_HUMAN]	https://www.proteinatlas.org/ENSG00000049860-HEXB/pathology		UF	liver cancer (unfavourable)
Q8TCT9	HM13	Minor histocompatibility antigen H13 OS=Homo sapiens GN=HM13 PE=1 SV=1 - [HM13_HUMAN]	https://www.proteinatlas.org/ENSG00000101294-HM13/pathology	Prognostic marker in renal cancer (unfavourable) and liver cancer (unfavourable).	UF	renal cancer (unfavourable) and liver cancer (unfavourable)
P14625	HSP90B1	Endoplasmin OS=Homo sapiens GN=HSP90B1 PE=1 SV=1 - [ENPL_HUMAN]	https://www.proteinatlas.org/ENSG00000166598-HSP90B1/pathology	Prognostic marker in renal cancer (unfavourable).	UF	renal cancer (unfavourable)
Q9Y4L1	HYOU1	Hypoxia up-regulated protein 1 OS=Homo sapiens GN=HYOU1 PE=1 SV=1 - [HYOU1_HUMAN]	https://www.proteinatlas.org/ENSG00000149428-HYOU1/pathology	Prognostic marker in renal cancer (unfavourable), endometrial cancer (favourable) and thyroid cancer (unfavourable).	UF/F	renal cancer (unfavourable), endometrial cancer (favourable) and thyroid cancer (unfavourable)
P11717	IGF2R	Cation-independent mannose-6-phosphate receptor OS=Homo sapiens GN=IGF2R PE=1 SV=3 - [MPRI_HUMAN]	https://www.proteinatlas.org/ENSG00000197081-IGF2R/pathology	Prognostic marker in cervical cancer (unfavourable), breast cancer (unfavourable) and urothelial cancer (unfavourable).	UF	cervical cancer (unfavourable), breast cancer (unfavourable) and urothelial cancer (unfavourable)
Q70UQ0	IKBIP	Inhibitor of nuclear factor kappa-B kinase-interacting protein OS=Homo sapiens GN=IKBIP PE=1 SV=1 - [IKIP_HUMAN]	https://www.proteinatlas.org/ENSG00000166130-IKBIP/pathology	Prognostic marker in renal cancer (unfavourable) and liver cancer (unfavourable).	UF	renal cancer (unfavourable) and liver cancer (unfavourable)
P40189	IL6ST	Interleukin-6 receptor subunit beta OS=Homo sapiens GN=IL6ST PE=1 SV=2 - [IL6RB_HUMAN]	https://www.proteinatlas.org/ENSG00000134352-IL6ST/pathology	Prognostic marker in renal cancer (unfavourable).	UF	renal cancer (unfavourable)
Q9NX62	IMPAD1	Inositol monophosphatase 3 OS=Homo sapiens GN=IMPAD1 PE=1 SV=1 - [IMPA3_HUMAN]	https://www.proteinatlas.org/ENSG00000104331-IMPAD1/pathology
P56199	ITGA1	Integrin alpha-1 OS=Homo sapiens GN=ITGA1 PE=1 SV=2 - [ITA1_HUMAN]	https://www.proteinatlas.org/ENSG00000213949-ITGA1/pathology	Prognostic marker in renal cancer (unfavourable).	UF	renal cancer (unfavourable)
P17301	ITGA2	Integrin alpha-2 OS=Homo sapiens GN=ITGA2 PE=1 SV=1 - [ITA2_HUMAN]	https://www.proteinatlas.org/ENSG00000164171-ITGA2/pathology	Prognostic marker in pancreatic cancer (unfavourable).	UF	pancreatic cancer (unfavourable)
P26006	ITGA3	Integrin alpha-3 OS=Homo sapiens GN=ITGA3 PE=1 SV=5 - [ITA3_HUMAN]	https://www.proteinatlas.org/ENSG00000005884-ITGA3/pathology	Prognostic marker in pancreatic cancer (unfavourable), head and neck cancer (unfavourable) and cervical cancer (unfavourable).	UF	pancreatic cancer (unfavourable), head and neck cancer (unfavourable) and cervical cancer (unfavourable)
P08648	ITGA5	Integrin alpha-5 OS=Homo sapiens GN=ITGA5 PE=1 SV=2 - [ITA5_HUMAN]	https://www.proteinatlas.org/ENSG00000161638-ITGA5/pathology	Prognostic marker in renal cancer (unfavourable), cervical cancer (unfavourable), liver cancer (unfavourable), lung cancer (unfavourable), head and neck cancer(unfavourable), colorectal cancer (unfavourable) and thyroid cancer (unfavourable).	UF	renal cancer (unfavourable), cervical cancer (unfavourable), liver cancer (unfavourable), lung cancer (unfavourable), head and neck cancer(unfavourable), colorectal cancer (unfavourable) and thyroid cancer (unfavourable)
P23229	ITGA6	Integrin alpha-6 OS=Homo sapiens GN=ITGA6 PE=1 SV=5 - [ITA6_HUMAN]	https://www.proteinatlas.org/ENSG00000091409-ITGA6/pathology	Prognostic marker in renal cancer (favourable) and head and neck cancer (unfavourable).	UF/F	renal cancer (favourable) and head and neck cancer (unfavourable)
P06756	ITGAV	Integrin alpha-V OS=Homo sapiens GN=ITGAV PE=1 SV=2 - [ITAV_HUMAN]	https://www.proteinatlas.org/ENSG00000138448-ITGAV/pathology	Prognostic marker in stomach cancer (unfavourable), liver cancer (unfavourable) and pancreatic cancer (unfavourable).	UF	stomach cancer (unfavourable), liver cancer (unfavourable) and pancreatic cancer (unfavourable)
P05556	ITGB1	Integrin beta-1 OS=Homo sapiens GN=ITGB1 PE=1 SV=2 - [ITB1_HUMAN]	https://www.proteinatlas.org/ENSG00000150093-ITGB1/pathology	Prognostic marker in lung cancer (unfavourable) and cervical cancer (unfavourable).	UF	lung cancer (unfavourable) and cervical cancer (unfavourable)
P18084	ITGB5	Integrin beta-5 OS=Homo sapiens GN=ITGB5 PE=1 SV=1 - [ITB5_HUMAN]	https://www.proteinatlas.org/ENSG00000082781-ITGB5/pathology	Prognostic marker in pancreatic cancer (unfavourable).	UF	pancreatic cancer (unfavourable)
P78504	JAG1	Protein jagged-1 OS=Homo sapiens GN=JAG1 PE=1 SV=3 - [JAG1_HUMAN]	https://www.proteinatlas.org/ENSG00000101384-JAG1/pathology	Prognostic marker in pancreatic cancer (unfavourable).	UF	pancreatic cancer (unfavourable)
P11047	LAMC1	Laminin subunit gamma-1 OS=Homo sapiens GN=LAMC1 PE=1 SV=3 - [LAMC1_HUMAN]	https://www.proteinatlas.org/ENSG00000135862-LAMC1/pathology	Prognostic marker in urothelial cancer (unfavourable).	UF	urothelial cancer (unfavourable)
P11279	LAMP1	Lysosome-associated membrane glycoprotein 1 OS=Homo sapiens GN=LAMP1 PE=1 SV=3 - [LAMP1_HUMAN]	https://www.proteinatlas.org/ENSG00000185896-LAMP1/pathology	Prognostic marker in renal cancer (favourable).	F	renal cancer (favourable)
P13473	LAMP2	Lysosome-associated membrane glycoprotein 2 OS=Homo sapiens GN=LAMP2 PE=1 SV=2 - [LAMP2_HUMAN]	https://www.proteinatlas.org/ENSG00000005893-LAMP2/pathology
P01130	LDLR	Low-density lipoprotein receptor OS=Homo sapiens GN=LDLR PE=1 SV=1 - [LDLR_HUMAN]	https://www.proteinatlas.org/ENSG00000130164-LDLR/pathology	Prognostic marker in pancreatic cancer (unfavourable), urothelial cancer (unfavourable) and renal cancer (unfavourable).	UF	pancreatic cancer (unfavourable), urothelial cancer (unfavourable) and renal cancer (unfavourable)
Q99538	LGMN	Legumain OS=Homo sapiens GN=LGMN PE=1 SV=1 - [LGMN_HUMAN]	https://www.proteinatlas.org/ENSG00000100600-LGMN/pathology	Prognostic marker in renal cancer (favourable).	F	renal cancer (favourable)
P38571	LIPA	Lysosomal acid lipase/cholesteryl ester hydrolase OS=Homo sapiens GN=LIPA PE=1 SV=2 - [LICH_HUMAN]	https://www.proteinatlas.org/ENSG00000107798-LIPA/pathology
Q9UIQ6	LNPEP	Leucyl-cystinyl aminopeptidase OS=Homo sapiens GN=LNPEP PE=1 SV=3 - [LCAP_HUMAN]	https://www.proteinatlas.org/ENSG00000113441-LNPEP/pathology
Q07954	LRP1	Prolow-density lipoprotein receptor-related protein 1 OS=Homo sapiens GN=LRP1 PE=1 SV=2 - [LRP1_HUMAN]	https://www.proteinatlas.org/ENSG00000123384-LRP1/pathology	Prognostic marker in urothelial cancer (unfavourable) and renal cancer (unfavourable).	UF	urothelial cancer (unfavourable) and renal cancer (unfavourable)
Q7Z4F1	LRP10	Low-density lipoprotein receptor-related protein 10 OS=Homo sapiens GN=LRP10 PE=1 SV=2 - [LRP10_HUMAN]	https://www.proteinatlas.org/ENSG00000197324-LRP10/pathology	Prognostic marker in liver cancer (unfavourable), renal cancer (favourable) and lung cancer (unfavourable).	UF/F	liver cancer (unfavourable), renal cancer (favourable) and lung cancer (unfavourable)
P20645	M6PR	Cation-dependent mannose-6-phosphate receptor OS=Homo sapiens GN=M6PR PE=1 SV=1 - [MPRD_HUMAN]	https://www.proteinatlas.org/ENSG00000003056-M6PR/pathology	Prognostic marker in liver cancer (unfavourable).	UF	liver cancer (unfavourable)
Q16706	MAN2A1	Alpha-mannosidase 2 OS=Homo sapiens GN=MAN2A1 PE=1 SV=2 - [MA2A1_HUMAN]	https://www.proteinatlas.org/ENSG00000112893-MAN2A1/pathology
P08581	MET	Hepatocyte growth factor receptor OS=Homo sapiens GN=MET PE=1 SV=4 - [MET_HUMAN]	https://www.proteinatlas.org/ENSG00000105976-MET/pathology	Prognostic marker in pancreatic cancer (unfavourable) and head and neck cancer (unfavourable).	UF	Prognostic marker in pancreatic cancer (unfavourable) and head and neck cancer (unfavourable).
Q08431	MFGE8	Lactadherin OS=Homo sapiens GN=MFGE8 PE=1 SV=2 - [MFGM_HUMAN]	https://www.proteinatlas.org/ENSG00000140545-MFGE8/pathology	Prognostic marker in renal cancer (unfavourable) and stomach cancer (unfavourable).	UF	renal cancer (unfavourable) and stomach cancer (unfavourable)
Q3V5L5	MGAT5B	Alpha-1,6-mannosylglycoprotein 6-beta-N-acetylglucosaminyltransferase B OS=Homo sapiens GN=MGAT5B PE=1 SV=2 - [MGT5B_HUMAN]	https://www.proteinatlas.org/ENSG00000167889-MGAT5B/pathology
Q29983	MICA	MHC class I polypeptide-related sequence A OS=Homo sapiens GN=MICA PE=1 SV=1 - [MICA_HUMAN]	https://www.proteinatlas.org/ENSG00000204520-MICA/pathology	Prognostic marker in cervical cancer (unfavourable).	UF	cervical cancer (unfavourable)
Q29980	MICB	MHC class I polypeptide-related sequence B OS=Homo sapiens GN=MICB PE=1 SV=1 - [MICB_HUMAN]	https://www.proteinatlas.org/ENSG00000204516-MICB/pathology	Prognostic marker in renal cancer (unfavourable) and liver cancer (unfavourable).	UF	renal cancer (unfavourable) and liver cancer (unfavourable)
Q9UBG0	MRC2	C-type mannose receptor 2 OS=Homo sapiens GN=MRC2 PE=1 SV=2 - [MRC2_HUMAN]	https://www.proteinatlas.org/ENSG00000011028-MRC2/pathology	Prognostic marker in renal cancer (unfavourable) and ovarian cancer (unfavourable).	UF	renal cancer (unfavourable) and ovarian cancer (unfavourable)
Q92542	NCSTN	Nicastrin OS=Homo sapiens GN=NCSTN PE=1 SV=2 - [NICA_HUMAN]	https://www.proteinatlas.org/ENSG00000162736-NCSTN/pathology	Prognostic marker in renal cancer (unfavourable).	UF	renal cancer (unfavourable)
Q7Z3B1	NEGR1	Neuronal growth regulator 1 OS=Homo sapiens GN=NEGR1 PE=1 SV=3 - [NEGR1_HUMAN]	https://www.proteinatlas.org/ENSG00000172260-NEGR1/pathology
Q04721	NOTCH2	Neurogenic locus notch homolog protein 2 OS=Homo sapiens GN=NOTCH2 PE=1 SV=3 - [NOTC2_HUMAN]	https://www.proteinatlas.org/ENSG00000134250-NOTCH2/pathology	Prognostic marker in ovarian cancer (unfavourable) and pancreatic cancer (unfavourable).	UF	ovarian cancer (unfavourable) and pancreatic cancer (unfavourable)
O15118	NPC1	Niemann-Pick C1 protein OS=Homo sapiens GN=NPC1 PE=1 SV=2 - [NPC1_HUMAN]	https://www.proteinatlas.org/ENSG00000141458-NPC1/pathology	Prognostic marker in liver cancer (unfavourable).	UF	liver cancer (unfavourable)
Q9Y639	NPTN	Neuroplastin OS=Homo sapiens GN=NPTN PE=1 SV=2 - [NPTN_HUMAN]	https://www.proteinatlas.org/ENSG00000156642-NPTN/pathology
O14786	NRP1	Neuropilin-1 OS=Homo sapiens GN=NRP1 PE=1 SV=3 - [NRP1_HUMAN]	https://www.proteinatlas.org/ENSG00000099250-NRP1/pathology	Prognostic marker in stomach cancer (unfavourable), cervical cancer (unfavourable), renal cancer (unfavourable) and glioma (unfavourable).	UF	stomach cancer (unfavourable), cervical cancer (unfavourable), renal cancer (unfavourable) and glioma (unfavourable)
P21589	NT5E	5'-nucleotidase OS=Homo sapiens GN=NT5E PE=1 SV=1 - [5NTD_HUMAN]		Prognostic marker in pancreatic cancer (unfavourable), stomach cancer (unfavourable) and lung cancer (unfavourable)	UF	pancreatic cancer (unfavourable), stomach cancer (unfavourable) and lung cancer (unfavourable)
Q99650	OSMR	Oncostatin-M-specific receptor subunit beta OS=Homo sapiens GN=OSMR PE=1 SV=1 - [OSMR_HUMAN]	https://www.proteinatlas.org/ENSG00000145623-OSMR/pathology	Prognostic marker in renal cancer (unfavourable) and cervical cancer (unfavourable).	UF	renal cancer (unfavourable) and cervical cancer (unfavourable)
Q32P28	P3H1	Prolyl 3-hydroxylase 1 OS=Homo sapiens GN=LEPRE1 PE=1 SV=2 - [P3H1_HUMAN]	https://www.proteinatlas.org/ENSG00000117385-P3H1/pathology	Prognostic marker in renal cancer (unfavourable) and liver cancer (unfavourable).	UF	renal cancer (unfavourable) and liver cancer (unfavourable)
P13674	P4HA1	Prolyl 4-hydroxylase subunit alpha-1 OS=Homo sapiens GN=P4HA1 PE=1 SV=2 - [P4HA1_HUMAN]	https://www.proteinatlas.org/ENSG00000122884-P4HA1/pathology	Prognostic marker in renal cancer (unfavourable), head and neck cancer (unfavourable), cervical cancer (unfavourable), pancreatic cancer (unfavourable), lung cancer(unfavourable) and breast cancer (unfavourable).	UF	renal cancer (unfavourable), head and neck cancer (unfavourable), cervical cancer (unfavourable), pancreatic cancer (unfavourable), lung cancer(unfavourable) and breast cancer (unfavourable)
Q92508	PIEZO1	Piezo-type mechanosensitive ion channel component 1 OS=Homo sapiens GN=PIEZO1 PE=1 SV=4 - [PIEZ1_HUMAN]	https://www.proteinatlas.org/ENSG00000103335-PIEZO1/pathology	Prognostic marker in renal cancer (unfavourable), lung cancer (unfavourable), cervical cancer (unfavourable) and ovarian cancer (unfavourable).	UF	renal cancer (unfavourable), lung cancer (unfavourable), cervical cancer (unfavourable) and ovarian cancer (unfavourable)
O95427	PIGN	GPI ethanolamine phosphate transferase 1 OS=Homo sapiens GN=PIGN PE=1 SV=1 - [PIGN_HUMAN]	https://www.proteinatlas.org/ENSG00000197563-PIGN/pathology	Prognostic marker in colorectal cancer (favourable).	F	colorectal cancer (favourable)
Q969N2	PIGT	GPI transamidase component PIG-T OS=Homo sapiens GN=PIGT PE=1 SV=1 - [PIGT_HUMAN]	https://www.proteinatlas.org/ENSG00000124155-PIGT/pathology	Prognostic marker in pancreatic cancer (favourable).	F	pancreatic cancer (favourable)
Q03405	PLAUR	Urokinase plasminogen activator surface receptor OS=Homo sapiens GN=PLAUR PE=1 SV=1 - [UPAR_HUMAN]	https://www.proteinatlas.org/ENSG00000011422-PLAUR/pathology	Prognostic marker in renal cancer (unfavourable) and lung cancer (unfavourable).	UF	renal cancer (unfavourable) and lung cancer (unfavourable)
Q8NHP8	PLBD2	Putative phospholipase B-like 2 OS=Homo sapiens GN=PLBD2 PE=1 SV=2 - [PLBL2_HUMAN]	https://www.proteinatlas.org/ENSG00000151176-PLBD2/pathology	Prognostic marker in renal cancer (unfavourable).	UF	renal cancer (unfavourable)
Q8IV08	PLD3	Phospholipase D3 OS=Homo sapiens GN=PLD3 PE=1 SV=1 - [PLD3_HUMAN]	https://www.proteinatlas.org/ENSG00000105223-PLD3/pathology	Prognostic marker in renal cancer (favourable) and pancreatic cancer (favourable).	F	renal cancer (favourable) and pancreatic cancer (favourable)
P55058	PLTP	Phospholipid transfer protein OS=Homo sapiens GN=PLTP PE=1 SV=1 - [PLTP_HUMAN]	https://www.proteinatlas.org/ENSG00000100979-PLTP/pathology	Prognostic marker in renal cancer (unfavourable).	UF	renal cancer (unfavourable)
Q9UIW2	PLXNA1	Plexin-A1 OS=Homo sapiens GN=PLXNA1 PE=1 SV=3 - [PLXA1_HUMAN]	https://www.proteinatlas.org/ENSG00000114554-PLXNA1/pathology	Prognostic marker in liver cancer (unfavourable), renal cancer (unfavourable) and ovarian cancer (unfavourable).	UF	liver cancer (unfavourable), renal cancer (unfavourable) and ovarian cancer (unfavourable)
O15031	PLXNB2	Plexin-B2 OS=Homo sapiens GN=PLXNB2 PE=1 SV=3 - [PLXB2_HUMAN]	https://www.proteinatlas.org/ENSG00000196576-PLXNB2/pathology	Prognostic marker in stomach cancer (favourable) and ovarian cancer (unfavourable).	UF/F	stomach cancer (favourable) and ovarian cancer (unfavourable)
Q8NBL1	POGLUT1	Protein O-glucosyltransferase 1 OS=Homo sapiens GN=POGLUT1 PE=1 SV=1 - [PGLT1_HUMAN]	https://www.proteinatlas.org/ENSG00000163389-POGLUT1/pathology	Prognostic marker in renal cancer (unfavourable) and urothelial cancer (favourable).	UF/F	renal cancer (unfavourable) and urothelial cancer (favourable)
P50897	PPT1	Palmitoyl-protein thioesterase 1 OS=Homo sapiens GN=PPT1 PE=1 SV=1 - [PPT1_HUMAN]	https://www.proteinatlas.org/ENSG00000131238-PPT1/pathology	Prognostic marker in liver cancer (unfavourable).	UF	liver cancer (unfavourable)
P04156	PRNP	Major prion protein OS=Homo sapiens GN=PRNP PE=1 SV=1 - [PRIO_HUMAN]	https://www.proteinatlas.org/ENSG00000171867-PRNP/pathology	Prognostic marker in liver cancer (unfavourable), glioma (unfavourable), colorectal cancer (unfavourable) and endometrial cancer (unfavourable).	UF	liver cancer (unfavourable), glioma (unfavourable), colorectal cancer (unfavourable) and endometrial cancer (unfavourable)
P07602	PSAP	Prosaposin OS=Homo sapiens GN=PSAP PE=1 SV=2 - [SAP_HUMAN]	https://www.proteinatlas.org/ENSG00000197746-PSAP/pathology
Q13308	PTK7	Inactive tyrosine-protein kinase 7 OS=Homo sapiens GN=PTK7 PE=1 SV=2 - [PTK7_HUMAN]	https://www.proteinatlas.org/ENSG00000112655-PTK7/pathology
P10586	PTPRF	Receptor-type tyrosine-protein phosphatase F OS=Homo sapiens GN=PTPRF PE=1 SV=2 - [PTPRF_HUMAN]	https://www.proteinatlas.org/ENSG00000142949-PTPRF/pathology	Prognostic marker in liver cancer (unfavourable) and stomach cancer (favourable).	UF/F	liver cancer (unfavourable) and stomach cancer (favourable)
P23470	PTPRG	Receptor-type tyrosine-protein phosphatase gamma OS=Homo sapiens GN=PTPRG PE=1 SV=4 - [PTPRG_HUMAN]	https://www.proteinatlas.org/ENSG00000144724-PTPRG/pathology	Prognostic marker in renal cancer (favourable).	F	renal cancer (favourable)
P53801	PTTG1IP	Pituitary tumor-transforming gene 1 protein-interacting protein OS=Homo sapiens GN=PTTG1IP PE=1 SV=1 - [PTTG_HUMAN]	https://www.proteinatlas.org/ENSG00000183255-PTTG1IP/pathology	Prognostic marker in pancreatic cancer (unfavourable), stomach cancer (unfavourable) and cervical cancer (unfavourable).	UF	pancreatic cancer (unfavourable), stomach cancer (unfavourable) and cervical cancer (unfavourable)
P15151	PVR	Poliovirus receptor OS=Homo sapiens GN=PVR PE=1 SV=2 - [PVR_HUMAN]	https://www.proteinatlas.org/ENSG00000073008-PVR/pathology	Prognostic marker in cervical cancer (unfavourable), urothelial cancer (unfavourable) and lung cancer (unfavourable).	UF	cervical cancer (unfavourable), urothelial cancer (unfavourable) and lung cancer (unfavourable)
O00391	QSOX1	Sulfhydryl oxidase 1 OS=Homo sapiens GN=QSOX1 PE=1 SV=3 - [QSOX1_HUMAN]	https://www.proteinatlas.org/ENSG00000116260-QSOX1/pathology	Prognostic marker in renal cancer (unfavourable).	UF	renal cancer (unfavourable)
Q6ZRP7	QSOX2	Sulfhydryl oxidase 2 OS=Homo sapiens GN=QSOX2 PE=1 SV=3 - [QSOX2_HUMAN]	https://www.proteinatlas.org/ENSG00000165661-QSOX2/pathology	Prognostic marker in renal cancer (unfavourable).	UF	renal cancer (unfavourable)
Q01973	ROR1	Tyrosine-protein kinase transmembrane receptor ROR1 OS=Homo sapiens GN=ROR1 PE=1 SV=2 - [ROR1_HUMAN]	https://www.proteinatlas.org/ENSG00000185483-ROR1/pathology
Q12770	SCAP	Sterol regulatory element-binding protein cleavage-activating protein OS=Homo sapiens GN=SCAP PE=1 SV=4 - [SCAP_HUMAN]	https://www.proteinatlas.org/ENSG00000114650-SCAP/pathology	Prognostic marker in renal cancer (favourable) and pancreatic cancer (favourable).	F	renal cancer (favourable) and pancreatic cancer (favourable)
Q14108	SCARB2	Lysosome membrane protein 2 OS=Homo sapiens GN=SCARB2 PE=1 SV=2 - [SCRB2_HUMAN]	https://www.proteinatlas.org/ENSG00000138760-SCARB2/pathology	Prognostic marker in breast cancer (unfavourable).	UF	breast cancer (unfavourable)
Q15758	SLC1A5	Neutral amino acid transporter B(0) OS=Homo sapiens GN=SLC1A5 PE=1 SV=2 - [AAAT_HUMAN]	https://www.proteinatlas.org/ENSG00000105281-SLC1A5/pathology	Prognostic marker in liver cancer (unfavourable) and renal cancer (unfavourable).	UF	liver cancer (unfavourable) and renal cancer (unfavourable)
Q15043	SLC39A14	Zinc transporter ZIP14 OS=Homo sapiens GN=SLC39A14 PE=1 SV=3 - [S39AE_HUMAN]	https://www.proteinatlas.org/ENSG00000104635-SLC39A14/pathology	Prognostic marker in renal cancer (unfavourable) and colorectal cancer (favourable).	UF/F	renal cancer (unfavourable) and colorectal cancer (favourable)
P08195	SLC3A2	4F2 cell-surface antigen heavy chain OS=Homo sapiens GN=SLC3A2 PE=1 SV=3 - [4F2_HUMAN]	https://www.proteinatlas.org/ENSG00000168003-SLC3A2/pathology	Prognostic marker in urothelial cancer (unfavourable), liver cancer (unfavourable) and renal cancer (favourable).	UF/F	urothelial cancer (unfavourable), liver cancer (unfavourable) and renal cancer (favourable)
Q8IWA5	SLC44A2	Choline transporter-like protein 2 OS=Homo sapiens GN=SLC44A2 PE=1 SV=3 - [CTL2_HUMAN]	https://www.proteinatlas.org/ENSG00000129353-SLC44A2/pathology	Prognostic marker in renal cancer (favourable) and pancreatic cancer (unfavourable).	UF/F	renal cancer (favourable) and pancreatic cancer (unfavourable)
P30825	SLC7A1	High affinity cationic amino acid transporter 1 OS=Homo sapiens GN=SLC7A1 PE=1 SV=1 - [CTR1_HUMAN]	https://www.proteinatlas.org/ENSG00000139514-SLC7A1/pathology	Prognostic marker in renal cancer (unfavourable).	UF	renal cancer (unfavourable)
O94813	SLIT2	Slit homolog 2 protein OS=Homo sapiens GN=SLIT2 PE=1 SV=1 - [SLIT2_HUMAN]	https://www.proteinatlas.org/ENSG00000145147-SLIT2/pathology	Prognostic marker in renal cancer (favourable).	F	renal cancer (favourable)
Q96PQ0	SORCS2	VPS10 domain-containing receptor SorCS2 OS=Homo sapiens GN=SORCS2 PE=1 SV=3 - [SORC2_HUMAN]	https://www.proteinatlas.org/ENSG00000184985-SORCS2/pathology	Prognostic marker in renal cancer (unfavourable) and ovarian cancer (unfavourable).	UF	renal cancer (unfavourable) and ovarian cancer (unfavourable)
Q99523	SORT1	Sortilin OS=Homo sapiens GN=SORT1 PE=1 SV=3 - [SORT_HUMAN]	https://www.proteinatlas.org/ENSG00000134243-SORT1/pathology	Prognostic marker in colorectal cancer (favourable) and liver cancer (unfavourable).	UF/F	colorectal cancer (favourable) and liver cancer (unfavourable)
Q11201	ST3GAL1	CMP-N-acetylneuraminate-beta-galactosamide-alpha-2,3-sialyltransferase 1 OS=Homo sapiens GN=ST3GAL1 PE=2 SV=1 - [SIA4A_HUMAN]	https://www.proteinatlas.org/ENSG00000008513-ST3GAL1/pathology
Q9P273	TENM3	Teneurin-3 OS=Homo sapiens GN=TENM3 PE=2 SV=3 - [TEN3_HUMAN]	https://www.proteinatlas.org/ENSG00000218336-TENM3/pathology
P02786	TFRC	Transferrin receptor protein 1 OS=Homo sapiens GN=TFRC PE=1 SV=2 - [TFR1_HUMAN]	https://www.proteinatlas.org/ENSG00000072274-TFRC/pathology	Prognostic marker in liver cancer (unfavourable), thyroid cancer (unfavourable) and cervical cancer (unfavourable).	UF	liver cancer (unfavourable), thyroid cancer (unfavourable) and cervical cancer (unfavourable)
P07996	THBS1	Thrombospondin-1 OS=Homo sapiens GN=THBS1 PE=1 SV=2 - [TSP1_HUMAN]	https://www.proteinatlas.org/ENSG00000137801-THBS1/pathology	Prognostic marker in renal cancer (unfavourable) and stomach cancer (unfavourable).	UF	renal cancer (unfavourable) and stomach cancer (unfavourable)
P49755	TMED10	Transmembrane emp24 domain-containing protein 10 OS=Homo sapiens GN=TMED10 PE=1 SV=2 - [TMEDA_HUMAN]	https://www.proteinatlas.org/ENSG00000170348-TMED10/pathology	Prognostic marker in thyroid cancer (unfavourable).	UF	thyroid cancer (unfavourable)
Q9Y3B3	TMED7	Transmembrane emp24 domain-containing protein 7 OS=Homo sapiens GN=TMED7 PE=1 SV=2 - [TMED7_HUMAN]	https://www.proteinatlas.org/ENSG00000134970-TMED7/pathology
Q9BVK6	TMED9	Transmembrane emp24 domain-containing protein 9 OS=Homo sapiens GN=TMED9 PE=1 SV=2 - [TMED9_HUMAN]	https://www.proteinatlas.org/ENSG00000184840-TMED9/pathology	Prognostic marker in renal cancer (unfavourable).	UF	renal cancer (unfavourable)
Q9NUM4	TMEM106B	Transmembrane protein 106B OS=Homo sapiens GN=TMEM106B PE=1 SV=2 - [T106B_HUMAN]	https://www.proteinatlas.org/ENSG00000106460-TMEM106B/pathology
Q9UHN6	TMEM2	Transmembrane protein 2 OS=Homo sapiens GN=TMEM2 PE=1 SV=1 - [TMEM2_HUMAN]	https://www.proteinatlas.org/ENSG00000135048-TMEM2/pathology	Prognostic marker in renal cancer (unfavourable).	UF	renal cancer (unfavourable)
Q6ZXV5	TMTC3	Transmembrane and TPR repeat-containing protein 3 OS=Homo sapiens GN=TMTC3 PE=1 SV=2 - [TMTC3_HUMAN]	https://www.proteinatlas.org/ENSG00000139324-TMTC3/pathology
P24821	TNC	Tenascin OS=Homo sapiens GN=TNC PE=1 SV=3 - [TENA_HUMAN]	https://www.proteinatlas.org/ENSG00000041982-TNC/pathology
O75509	TNFRSF21	Tumor necrosis factor receptor superfamily member 21 OS=Homo sapiens GN=TNFRSF21 PE=1 SV=1 - [TNR21_HUMAN]	https://www.proteinatlas.org/ENSG00000146072-TNFRSF21/pathology	Prognostic marker in renal cancer (favourable).	F	renal cancer (favourable).
Q13641	TPBG	Trophoblast glycoprotein OS=Homo sapiens GN=TPBG PE=1 SV=1 - [TPBG_HUMAN]	https://www.proteinatlas.org/ENSG00000146242-TPBG/pathology	Prognostic marker in colorectal cancer (unfavourable)	UF	colorectal cancer (unfavourable)
O60637	TSPAN3	Tetraspanin-3 OS=Homo sapiens GN=TSPAN3 PE=2 SV=1 - [TSN3_HUMAN]	https://www.proteinatlas.org/ENSG00000140391-TSPAN3/pathology
Q9C0H2	TTYH3	Protein tweety homolog 3 OS=Homo sapiens GN=TTYH3 PE=1 SV=3 - [TTYH3_HUMAN]	https://www.proteinatlas.org/ENSG00000136295-TTYH3/pathology	Prognostic marker in liver cancer (unfavourable) and renal cancer (unfavourable).	UF	liver cancer (unfavourable) and renal cancer (unfavourable)
Q96J42	TXNDC15	Thioredoxin domain-containing protein 15 OS=Homo sapiens GN=TXNDC15 PE=1 SV=1 - [TXD15_HUMAN]	https://www.proteinatlas.org/ENSG00000113621-TXNDC15/pathology	Prognostic marker in renal cancer (unfavourable).	UF	renal cancer (unfavourable).
